# Supplementary material
Source: PubMed Central journal article supplement (PMC5882237)
Supplement: NIHMS949817-supplement-Supplemental.pdf [file NIHMS949817-supplement-Supplemental.pdf]

| Genome                            | Complete, single copy | Fragment | Not found |
|-----------------------------------|-----------------------|----------|-----------|
| <b>Complete reference genomes</b> |                       |          |           |
| wRi                               | 180                   | 2        | 39        |
| wMel                              | 180                   | 2        | 39        |
| wAu                               | 181                   | 2        | 38        |
| wHa                               | 179                   | 3        | 39        |
| wNo                               | 181                   | 4        | 36        |
| <b>Draft genome assemblies</b>    |                       |          |           |
| wRi_I14_18                        | 182 <sup>a</sup>      | 2        | 37        |
| wRi_I14_19                        | 182                   | 2        | 37        |
| wRi_LZV15_057                     | 181                   | 3        | 37        |
| wRi_LZV15_058                     | 182                   | 2        | 37        |
| wRi_NMB15_030                     | 182                   | 2        | 37        |
| wRi_USP16.124                     | 182                   | 2        | 37        |
| wRi_USP16.125                     | 182                   | 2        | 37        |
| wRi_Y14_29                        | 183                   | 2        | 36        |
| wAna_Cebu                         | 182                   | 2        | 37        |
| wAna_GB1                          | 181                   | 3        | 37        |
| wAna_HNL0501                      | 177                   | 7        | 37        |
| wAna_KMJ1                         | 181                   | 3        | 37        |
| wAna_OGS_98K1                     | 181                   | 3        | 37        |
| wAna_RC102                        | 182                   | 2        | 37        |
| wAna_TBU136                       | 182                   | 3        | 36        |
| wAna_VAV150                       | 181                   | 3        | 37        |
| wAno_A29                          | 181                   | 3        | 37        |
| wAno_CHC221                       | 181                   | 3        | 37        |
| wPan_CHC1                         | 182                   | 2        | 37        |
| wPan_CHG108                       | 181                   | 3        | 37        |

|              |     |   |    |
|--------------|-----|---|----|
| wPan_pl      | 181 | 3 | 37 |
| wSuz         | 182 | 2 | 37 |
| wSpc         | 182 | 2 | 37 |
| wAur_NGN1    | 181 | 3 | 37 |
| wAur_SP11-11 | 181 | 3 | 37 |
| wTri         | 181 | 3 | 37 |

---

**Table S1. Near-universal, single-copy proteobacteria genes, related to Figures 1 and 2 and Table 1.** We used BUSCO v. 3.0.0 [S1] to identify complete and fragmented proteobacteria genes (out of 221) found in our *Wolbachia* genomes. For comparison, we provide results for reference-quality *Wolbachia* genomes.

---

<sup>a</sup>The anomalous result of finding two more of the proteobacteria target genes in most of our draft wRi genomes than in the wRi reference genome [S2] is an apparent artifact of BUSCO v. 3.0.0. In our draft wRi genomes, POG09087Z77 is generally found as complete and POG0908053X is generally found as fragmented. Both are present in the wRi reference with 100% identity but are not found by BUSCO v. 3.0.0.

| Genes affected                           | Copy number change | Kolmogorov-Smirnov <i>P</i> -value | Affected genomes                |
|------------------------------------------|--------------------|------------------------------------|---------------------------------|
| <i>WD0631</i> ,<br><i>WD0632</i>         | 2 → 1*             | <0.0001                            | Both <i>w</i> Aur               |
| <i>WD0631</i> ,<br><i>WD0632</i>         | 2 → 4*             | <0.0001                            | <i>w</i> Ana_HNL0501            |
| <i>WRi_006710</i> ,<br><i>WRi_006720</i> | 1 → 0              | <0.0001                            | Both <i>w</i> Aur, <i>w</i> Tri |

**Table S2. Copy-number variants in CI-causing loci, related to Table 2.** All copy numbers are given relative to the *w*Ri reference [S2].

\*This sequence is duplicated in the *w*Ri genome, so it was treated as diploid in our ControlFREEC v. 8.0 analysis [S3].

| Species                 | Location                                            | $N$ | Infected | $\hat{p}$<br>(confidence interval) |
|-------------------------|-----------------------------------------------------|-----|----------|------------------------------------|
| <i>D. ananassae</i>     | Cairns, Australia                                   | 13  | 13       | 1.0 (0.75, 1.0)                    |
|                         | Townsville, Australia                               | 1   | 1        | 1.0 (0.03, 1.0)                    |
| Total                   |                                                     | 14  | 14       | 1.0 (0.77, 1.0)                    |
| <i>D. anomalata</i>     | Cairns, Australia                                   | 7   | 7        | 1.0 (0.59, 1.0)                    |
|                         | Townsville, Australia                               | 1   | 1        | 1.0 (0.03, 1.0)                    |
| Total                   |                                                     | 8   | 8        | 1.0 (0.63, 1.0)                    |
| <i>D. auraria</i>       | Japan                                               | 21  | 21       | 1.0 (0.84, 1.0)                    |
| <i>D. pandora</i>       | Cairns, Australia                                   | 7   | 7        | 1.0 (0.59, 1.0)                    |
| <i>D. suzukii</i>       | Haoping, Taibaishan, Shaanxi                        | 15  | 8        | 0.53 (0.27, 0.79)                  |
|                         | Zhongyuanzi, Xinling, Badong, Hubei                 | 1   | 1        | 1.0 (0.03, 1.0)                    |
|                         | Fushan Park, Qingdao, Shandong                      | 3   | 3        | 1.0 (0.29, 1.0)                    |
|                         | Laoyan, Tiancheng, Wanzhou, Chongqing               | 2   | 2        | 1.0 (0.16, 1.0)                    |
|                         | Zhanggou, Gaoqiao, Emeishan, Sichuan                | 1   | 1        | 1.0 (0.03, 1.0)                    |
|                         | Dahebian, Banpo, Yixiang, Puer, Yunnan              | 28  | 26       | 0.93 (0.76, 0.99)                  |
|                         | Guanshan Nature Reserve, Yifeng, Jiangxi            | 30  | 25       | 0.83 (0.65, 0.94)                  |
|                         | Total                                               |     | 80       | 66                                 |
| <i>D. subpulchrella</i> | Haoping, Taibaishan, Shaanxi                        | 15  | 11       | 0.73 (0.45, 0.92)                  |
|                         | Fuhusi-Shanjuesi, Mt. Emei, Sichuan                 | 16  | 8        | 0.50 (0.25, 0.75)                  |
|                         | Zhongyuanzi, Xinling, Badong, Hubei                 | 8   | 3        | 0.38 (0.09, 0.76)                  |
|                         | Laoyingqing, Dahebian, Banpo, Yixiang, Puer, Yunnan | 11  | 9        | 0.82 (0.48, 0.98)                  |
| Total                   |                                                     | 50  | 31       | 0.62 (0.47, 0.75)                  |

**Table S3. *Wolbachia* infection frequencies in natural populations, related to STAR Methods.**

We provide data from *D. ananassae*, *D. anomalata*, *D. auraria*, *D. pandora*, *D. suzukii*, and *D. subpulchrella*. Sample sizes ( $N$ ), estimated infection frequencies ( $\hat{p}$ ) and exact 95% binomial confidence intervals for each collection and species.

| Species              | Infection status |      | Mean hatch rate ( $\pm$ s.d.) | <i>N</i> | <i>P</i> |
|----------------------|------------------|------|-------------------------------|----------|----------|
|                      | Female           | Male |                               |          |          |
| <i>D. anomalata</i>  | U                | I    | 0.048 $\pm$ 0.168             | 43       | <0.001   |
|                      | I                | U    | 0.698 $\pm$ 0.247             | 30       |          |
| <i>D. auraria</i>    | U                | I    | 0.344 $\pm$ 0.184             | 17       | <0.001   |
|                      | I                | U    | 0.899 $\pm$ 0.093             | 18       |          |
| <i>D. pandora</i>    | U                | I    | 0.009 $\pm$ 0.027             | 24       | <0.001   |
|                      | I                | U    | 0.778 $\pm$ 0.294             | 23       |          |
| <i>D. triauraria</i> | U                | I    | 0.144 $\pm$ 0.167             | 17       | <0.001   |
|                      | I                | U    | 0.886 $\pm$ 0.093             | 16       |          |

**Table S4. Cytoplasmic incompatibility assays, related to STAR Methods.** We present data for *D. anomalata*, *D. auraria*, *D. pandora*, and *D. triauraria* infected with wRi-like *Wolbachia*. Data are mean egg hatch over five days for reciprocal crosses. *P* values are for one-tailed Mann-Whitney U tests.

U denotes *Wolbachia*-uninfected flies

I denotes *Wolbachia*-infected flies

*N* is the number of replicates

| Model                        | Root age (95%)      | wRi-clade age (95%) |
|------------------------------|---------------------|---------------------|
| Random tree shape            | 12009 (5193, 25183) | 1588 (663, 3514)    |
| Birth-death ( $\rho = 0.1$ ) | 13555 (5167, 27142) | 1333 (425, 2856)    |
| Birth-death ( $\rho = 0.5$ ) | 13985 (5737, 31378) | 1304 (514, 2967)    |

**Table S5. Age estimates for key nodes in Figure 1B.** We show the effects of alternative node-age priors on estimated divergence times (and 95% posterior support intervals) for wRi-like *Wolbachia*.

|                                            | <b>Model 1</b> | <b>Model 2</b> | <b>Model 3</b> | <b>Model 4</b> |
|--------------------------------------------|----------------|----------------|----------------|----------------|
| <i>D. suzukii</i>                          | -691419        | -691420        | <b>-679434</b> | <b>-679434</b> |
| <i>ananassae</i> , topology 1 <sup>a</sup> | -507233        | -507220        | -498620        | <b>-498608</b> |
| <i>ananassae</i> , topology 2              | -507229        | -507215        | -498628        | <b>-498612</b> |
| <i>ananassae</i> , topology 3              | -507234        | -507219        | -498630        | <b>-498613</b> |

**Table S6. Model selection, related to Figure 2.** Ln(marginal likelihood) for alternative models describing the joint evolution of mtDNA and *Wolbachia* within *D. suzukii* and three *ananassae* subgroup species (*cf.* Figure 2). See Methods for details of the calculations and descriptions of the models, which involve different partitions of the data (4 partitions, Models 1 and 2, versus 6 partitions, Models 3 and 4) and constant versus variable relative rates of mtDNA versus *Wolbachia* evolution (constant relative rates, Models 1 and 3, versus variable relative rates, Models 2 and 4). Preferred models indicated with bold.

The three topologies are the three alternative ways to resolve the trichotomy involving *D. pandora*, *D. anomalata* and three strains of *D. ananassae* shown in Figures 2C and 2D.

| Branch            | Topology 1 <sup>a, b</sup> | Topology 2 <sup>a, b</sup> | Topology 3 <sup>a, b</sup> |
|-------------------|----------------------------|----------------------------|----------------------------|
| Suz <sup>c</sup>  | (467, 566, 706)            | (465, 573, 704)            | (470, 579, 719)            |
| Ana <sup>1</sup>  | (205, 311, 491)            | (295, 402, 551)            | (341, 457, 616)            |
| Ana <sup>2</sup>  | (52, 180, 653)             | (53, 194, 736)             | (55, 194, 658)             |
| Ana <sup>3</sup>  | (340, 453, 609)            | (335, 448, 608)            | (293, 402, 558)            |
| Ana <sup>4</sup>  | (410, 715, 1347)           | (397, 706, 1340)           | (413, 723, 1350)           |
| Ana <sup>5</sup>  | (283, 396, 551)            | (286, 398, 547)            | (285, 393, 558)            |
| Ana <sup>6</sup>  | (65, 116, 212)             | (63, 113, 201)             | (61, 113, 207)             |
| Ana <sup>7</sup>  | (499, 853, 1535)           | (506, 879, 1658)           | (498, 872, 1598)           |
| Ana <sup>8</sup>  | (171, 229, 316)            | (168, 227, 308)            | (171, 231, 315)            |
| Ana <sup>9</sup>  | (126, 188, 284)            | (129, 191, 285)            | (129, 193, 285)            |
| Ana <sup>10</sup> | (846, 1470, 2716)          | (876, 1471, 2720)          | (848, 1480, 2725)          |
| Ana <sup>11</sup> | (217, 412, 818)            | (171, 334, 654)            | (204, 394, 762)            |
| Ano               | (265, 693, 2177)           | (275, 747, 2376)           | (116, 399, 1462)           |
| Pan               | (301, 406, 560)            | (200, 313, 489)            | (203, 312, 492)            |

**Table S7. Quartiles of the estimated ratio of mtDNA to *Wolbachia* substitutions, related to Figure 2.** The rows correspond to the branches in Figures 2B and 2D. The alternative topologies refer to the alternative resolutions of the trichotomies displayed in these figures.

<sup>a</sup>The three alternative *D. sukii* topologies are the resolutions of the (Brazil, Italy, Italy) trichotomy (denoted as Suz<sup>1</sup>, Suz<sup>2</sup> and Suz<sup>3</sup> in Figure 2E).

<sup>b</sup>The three *D. ananassae* topologies are the resolutions of the (*pandora*, *anomalata*, 3X *ananassae*) trichotomy. Topology 1 is ((*anomalata*, *pandora*), *ananassae*); topology 2 is ((*pandora*, *ananassae*), *anomalata*); topology 3 is ((*anomalata*, *ananassae*), *pandora*).

<sup>c</sup>The favored model for *D. sukii* has all branches sharing the same ratio of rates.



## Supplemental References

- [S1] Simão, F.A., Waterhouse, R.M., Ioannidis, P., Kriventseva E.V., and Zdobnov E.M. (2015). BUSCO: assessing genome assembly and annotation completeness with single-copy orthologs. *Bioinformatics* 31, 3210–3212.
- [S2] Klasson, L., Westberg, J., Sapountzis, P., Näslund, K., Lutnaes, Y., Darby, A.C., Veneti, Z., Chen, L., Braig, H.R., and Garrett, R. (2009). The mosaic genome structure of the *Wolbachia* wRi strain infecting *Drosophila simulans*. *Proc. Natl. Acad. Sci. USA* 106, 5725–5730.
- [S3] Boeva, V., Popova, T., Bleakley, K., Chiche, P., Cappo, J., Schleiermacher, G., Janoueix-Lerosey, I., Delattre, O., and Barillot, E. (2012). Control-FREEC: a tool for assessing copy number and allelic content using next-generation sequencing data. *Bioinformatics* 28, 423–425.
